# Supplementary material
Source: publisher site journal article supplement (https://www.dovepress.com/get_supplementary_file.php?f=472349.docx)

**Study Population/Flow Chart**

**
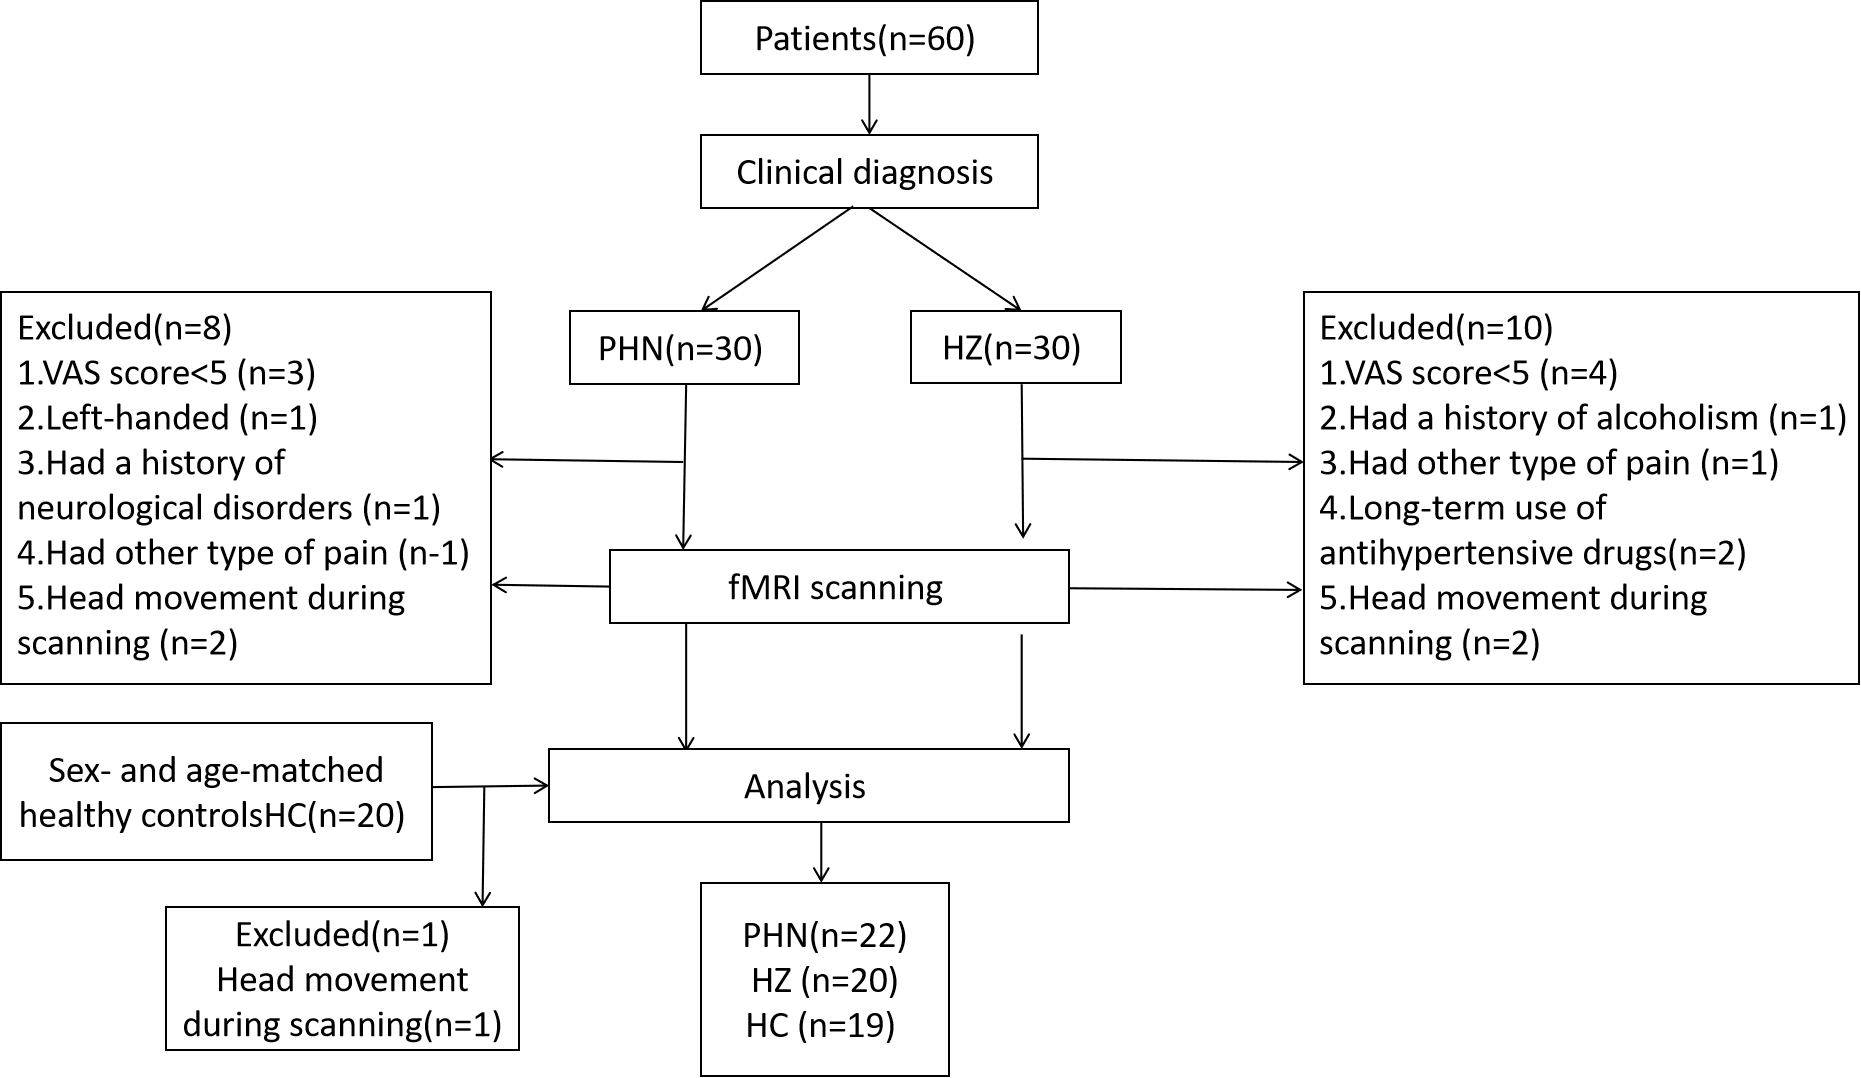
**

Supplement: Supplementary file 1 [file get_supplementary_file.php]
